# Supplementary material for: Genetically encoded photocatalytic protein labeling enables spatially-resolved profiling of intracellular proteome
Source: Springer Nature journal article supplement (doi:10.1038/s41467-023-38565-8), 2023-05-23
Supplement: MOESM1 [file 41467_2023_38565_MOESM1_ESM.pdf]

**Genetically encoded photocatalytic protein labeling enables spatially-resolved  
profiling of intracellular proteome**

Zheng *et al.*

**Supplementary Information**

**Supplementary Table 1. List of key reagents used in this study.**

| <b>Reagent</b>                                              | <b>Vendor</b> | <b>Catalog number</b> |
|-------------------------------------------------------------|---------------|-----------------------|
| DMEM                                                        | Gibco         | C11995500BT           |
| FBS                                                         | Gibco         | 10099141C             |
| PBS                                                         | Solarbio      | P1020-500ml           |
| Trypsin                                                     | Gibco         | 25300062              |
| Blasticidin                                                 | Selleck       | S7419                 |
| Hank's buffered salt solution                               | Solarbio      | H1025                 |
| OptiMEM                                                     | Gibco         | 31985062              |
| Lipofectamine 2000                                          | Invitrogen    | 11668019              |
| PEI (Polyethylenimine, branched)                            | Sigma-Aldrich | 408727-100ML          |
| CellTiter 96® Aqueous One Solution Cell Proliferation Assay | Promega       | G3580                 |
| Matrigel                                                    | Corning       | 356234                |
| BL21 competent cell                                         | Zomanbio      | ZC121-1               |
| DH5α competent cell                                         | Zomanbio      | ZC101-1               |
| Stable3 competent cell                                      | Zomanbio      | ZC108-1               |
| 1 M Tris-HCl buffer, pH 7.5                                 | Invitrogen    | 15567027              |
| Imidazole                                                   | Aladdin       | I108707-100g          |
| Ampicillin                                                  | Inalco        | 1758-9314             |
| Tryptone                                                    | Oxoid         | LP0042B               |
| Yeast extract                                               | Oxoid         | LP0021                |
| IPTG                                                        | Inalco        | 1758-400              |
| Ni-NTA beads                                                | Qiagen        | 30210                 |
| Agar                                                        | Sigma         | A7002-100g            |
| Agarose                                                     | Sigma         | 1655021               |
| TAE (Tris-acetate-EDTA) buffer                              | Beyotime      | ST716                 |
| PCR Phanta Max Super-Fidelity DNA Polymerase                | Vazyme        | P505-d2               |
| DNA loading buffer                                          | Vazyme        | P022-01               |
| DL 15000 marker                                             | Vazyme        | MD103-01              |
| DL 2000 marker                                              | Zomanbio      | ZM404-1               |
| Dpn1                                                        | NEB           | R0176L                |
| TIANquick Maxi Purification                                 | TIANGEN       | DP205-02              |
| Lightning cloning kit                                       | Biodragon     | BDIT0014              |
| EndoFree Mini Plasmid Kit II                                | TIANGEN       | DP118-02              |
| Bovine serum albumin                                        | Sangon        | A500023-0100          |
| Propargylamine                                              | Accela        | SY002930              |
| Biotin-hydrazide                                            | Macklin       | B854932-25mg          |
| Biotin-ethylacetamide                                       | Macklin       | B855100-50mg          |
| Biotin-PEG-NH <sub>2</sub>                                  | Biomatrik     | 246702                |
| DMSO                                                        | Concord       | S6491                 |

|                                            |                                  |               |
|--------------------------------------------|----------------------------------|---------------|
| Protease Inhibitor                         | Roche                            | 4693159001    |
| Methanol (for mass spectrometry analysis)  | Fisher chemical                  | A456-4        |
| Sodium dodecyl sulfate                     | Solarbio                         | S8010         |
| NaCl                                       | Sigma                            | S3014-1KG     |
| 1M Tris-HCl (pH=7.6)                       | Solarbio                         | T1140         |
| NP-40                                      | Thermo                           | 85124         |
| Sodium deoxycholate                        | Sigma                            | 30970         |
| CuSO <sub>4</sub>                          | Beijing Tongguang Fine Chemicals | 104041        |
| BTTAA                                      | Click chemistry tools            | 1236-500      |
| Biotin-azide                               | Aldrich                          | 762024        |
| Sodium ascorbate                           | Aladdin                          | S105024-100g  |
| Bio-Rad Micro Bio-Spin P-30 Gel            | Bio-Rad                          | 7326223       |
| Protein loading buffer                     | CWBio                            | CW0027S       |
| Protein marker                             | Bio-Rad                          | 1610374       |
| TEMED                                      | Biodee                           | T22500        |
| APS                                        | Beijing Yili Fine Chemicals      | ylh067        |
| SDS-PAGE stacking gel buffer (4x)          | CWBio                            | CW0025S       |
| SDS-PAGE separating gel buffer (4x)        | CWBio                            | CW0026S       |
| Acr-Bis 30:1                               | CWBio                            | CW0024S       |
| Tris base                                  | Vetec                            | V900483-5KG   |
| Glycine                                    | Vetec                            | V900144-5KG   |
| Commassie Blue G250                        | Ourchem                          | 71011284      |
| Ethanol                                    | Beijing Tongguang Fine Chemicals | 678-2002      |
| Acetic Acid                                | Beijing Tongguang Fine Chemicals | 676-2007      |
| Methanol (for Western blot analysis)       | Beijing Tongguang Fine Chemicals | 008-2011      |
| TBST (20x)                                 | Biorigin                         | BN20543-500ML |
| Fast Silver Stain Kit                      | Beyotime                         | P0017S        |
| Clarity Western ECL Substrate              | BIORAD                           | 1705060       |
| Tween-20                                   | Macklin                          | T818927-500ML |
| DAPI                                       | Thermo                           | D1306         |
| Pierce BCA Protein Assay Kit               | Thermo                           | 23227         |
| Streptavidin agarose resin                 | Thermo                           | 20347         |
| Biotin                                     | TCI                              | B0463         |
| DL-Dithiothreitol (DTT)                    | Sigma                            | D9163-5G      |
| Iodoacetamide (IAA)                        | Sigma                            | I6125-5G      |
| Triethylammonium bicarbonate buffer (TEAB) | Sigma                            | T7408-100ml   |

|                                                              |                 |                  |
|--------------------------------------------------------------|-----------------|------------------|
| Urea                                                         | Sigma           | U1250-1000g      |
| Sequencing grade trypsin                                     | Promega         | V5111            |
| Trypsin                                                      | Sigma           | T1426            |
| HCHO                                                         | Sigma           | 252549-25ml      |
| <sup>13</sup> CD <sub>2</sub> O                              | Sigma           | 596388-1g        |
| Sodium cyanoborohydride                                      | Sigma           | 156159-10G       |
| NH <sub>3</sub> ·H <sub>2</sub> O                            | Aladdin         | A112079          |
| Formic Acid                                                  | Fluka           | 94318-50ml       |
| Trifluoroacetic acid (TFA)                                   | Macklin         | T818782          |
| Acetonitrile (ACN)                                           | Fisher chemical | A998-4           |
| TMT 10 plex Mass Tag Labeling Kits and Reagents              | Thermo          | 90110            |
| Pierce High pH Reverse Phase Peptide Fractionation Kit       | Thermo          | 84868            |
| <i>N</i> -hydroxysuccinimide (NHS)                           | J&K             | 117997           |
| 1-ethyl-3-(3-dimethylaminopropyl) carbodiimide hydrochloride | Solarbio        | E8170            |
| D-biotin                                                     | Sigma           | B4639            |
| Anhydrous DMF                                                | J&K             | LSC0S67          |
| 5-bromonaphthalen-1-amine                                    | Ark Pharm       | AK-79091         |
| tert-butyl prop-2-yn-1-ylcarbamate                           | Ark Pharm       | AK-76551         |
| PdCl <sub>2</sub> (PPh) <sub>3</sub>                         | Sigma           | 741248-1G        |
| CuI                                                          | Energy Chemical | E060162          |
| TEA                                                          | Aladdin         | T103288-100ml    |
| DCM                                                          | Aladdin         | D116154-100ml    |
| Na <sub>2</sub> SO <sub>4</sub>                              | Sigma           | V900052-500G     |
| Pd/C                                                         | Sigma-Aldrich   | 205699-1G        |
| Chloroform-d                                                 | Aladdin         | C109595-10×0.6ml |
| Dimethyl sulfoxide-D <sub>6</sub>                            | Sigma-Aldrich   | 1312264          |
| Methanol-D <sub>4</sub>                                      | Sigma-Aldrich   | 1362666          |

**Supplementary Table 2. List of antibodies used in this study.**

| <b>Name</b>                                | <b>Vendor</b> | <b>Catalog number</b> |
|--------------------------------------------|---------------|-----------------------|
| α-tubulin Mouse Monoclonal Antibody        | Biodragon     | B1052                 |
| HA-Tag Mouse Monoclonal Antibody           | Biodragon     | B1001                 |
| V5-Tag Mouse Monoclonal Antibody           | Biodragon     | B1168                 |
| Rabbit pAb to calnexin                     | Abcam         | ab22595               |
| TOMM20 Rabbit Antibody                     | Abcam         | ab186735              |
| Hsp60 Rabbit Polyclonal Antibody           | Abcam         | ab46798               |
| G3BP2 Rabbit Antibody                      | Abcam         | ab86135               |
| Goat Anti-Mouse IgG(H+L), HRP Conjugated   | Biodragon     | BF03001               |
| Goat Anti-Rabbit IgG (H+L), HRP Conjugated | Biodragon     | BF03008               |

|                                           |              |         |
|-------------------------------------------|--------------|---------|
| Goat anti-Rabbit-Alexa Fluor 488 IgG(H+L) | ThermoFisher | A-11034 |
| Goat anti-Mouse-Alexa Fluor 647 IgG(H+L)  | ThermoFisher | A-21236 |
| Goat anti-Mouse-Alexa Fluor 568 IgG(H+L)  | ThermoFisher | A-11031 |
| Streptavidin-HRP                          | ThermoFisher | 21124   |
| Streptavidin-Alexa Fluor 568              | ThermoFisher | S11226  |
| Streptavidin-Alexa Fluor 647              | ThermoFisher | S21374  |

**Supplementary Table 3. List of fusion constructs used in this study.**

| <b>Mammalian expression plasmids</b> |               |                                |                                      |
|--------------------------------------|---------------|--------------------------------|--------------------------------------|
| <b>Name</b>                          | <b>Vector</b> | <b>Localization</b>            | <b>Features</b>                      |
| mito-miniSOG                         | pLX304        | Mitochondria matrix            | BstBI-mito-V5-miniSOG-NheI           |
| mito-APEX2                           | pLX304        | Mitochondria matrix            | BstBI-mito-V5-APEX2-NheI             |
| miniSOG-Sec61b                       | pLX304        | ER membrane (ERM)              | BstBI-V5-miniSOG-Sec61 $\beta$ -NheI |
| H2B-miniSOG                          | pLX304        | Nucleus                        | BstBI-V5-H2B-miniSOG-NheI            |
| G3BP1-miniSOG                        | pLX304        | Stress granules                | BstBI-V5-G3BP1-miniSOG-NheI          |
| miniSOG-NES                          | pLX304        | Cytoplasm                      | BstBI-V5- miniSOG-GS3-Halotag-NheI   |
| miniSOG-KDEL                         | pLX304        | ER lumen                       | BstBI-ss-HA-miniSOG-KDEL             |
| SOPP3-KDEL                           | pLX304        | ER lumen                       | BstBI-ss-HA-SOPP3-KDEL               |
| <b>Bacterial expression plasmids</b> |               |                                |                                      |
| <b>Name</b>                          | <b>Vector</b> | <b>Features</b>                |                                      |
| miniSOG-His <sub>6</sub>             | pET21a        | BamHI-miniSOG-XhoI-6X His-tag  |                                      |
| sortase A-His <sub>6</sub>           | pET21a        | BamHI-sortaseA-XhoI-6X His-tag |                                      |

## SUPPLEMENTARY METHODS

### Chemical probe synthesis

Biotin-conjugated probes are synthesized following the protocol described in reference 1.

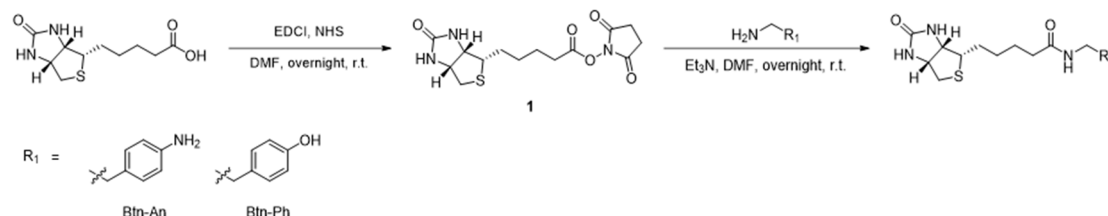

### Compound 1

Compound 1 was prepared by adding *N*-hydroxysuccinimide (NHS) (4.59 g, 40.0 mmol) and 1-ethyl-3-(3-dimethylaminopropyl) carbodiimide hydrochloride (EDC-HCl) (8.15 g, 42.6 mmol) to a solution of D-biotin (8.67 g, 35.5 mmol) in anhydrous DMF (100 mL). The reaction mixture was stirred overnight at room temperature. DMF was removed under reduced pressure to provide white solid. The white solid was washed by 4x50 mL cold ethanol and then dried under vacuum to afford compound 1. The yield was 60%.

$^1H$ -NMR (400 MHz,  $d^6$ -DMSO): 6.43 (1H, s), 6.37 (1H, s), 4.30 (1H, m), 4.15 (1H, m), 3.11 (2H, m), 2.84 (1H, dd), 2.81 (4H, s), 2.67 (2H, t), 2.60 (1H, d), 1.75-1.30 (6H, m).

### Biotin-Aniline (Probe 2) and Biotin-Phenol (Probe 3)

Biotin-Aniline: *N*-(4-aminophenethyl)biotinamide

Biotin-Phenol: *N*-(4-hydroxyphenethyl)biotinamide

To a solution of compound 1 (100 mg, 1.0 e.q.) and corresponding primary amine (1.0 e.q.) in 10 mL DMF was slowly added  $Et_3N$  (3.0 e.q.). The mixture was stirred overnight at room temperature. The solvent was removed by rotary evaporation. The residue was purified on a semi-preparative UPLC (Waters 2998 Photodiode Array Detector and 2545 Binary Gradient Module) equipped with a C18 reverse phase column (Waters XBridge Prep C18 5  $\mu$ m OBD 19x150 mm), using a gradient of 3% to 60% methanol in water over 25 min. The overall yields were 60-70%.

$^1H$ -NMR for Biotin-Aniline (400 MHz,  $d^6$ -DMSO): 7.78 (1H, t), 6.84 (2H, d), 6.49 (2H, d), 6.43 (1H, s), 6.36 (1H, s), 4.85 (2H, s), 4.31 (1H, m), 4.12 (1H, m), 3.16 (2H, dd), 3.09 (2H, dd), 2.84 (1H, dd), 2.56 (3H, m), 2.03 (2H, t), 1.38-1.66 (4H, m), 1.28 (2H, m).  $^{13}C$ -NMR for Biotin-Aniline (100 MHz,  $d^6$ -DMSO): 25.79, 28.51, 28.65, 35.00, 35.69, 40.32, 41.07, 55.89, 59.66, 61.50, 114.42, 126.82, 129.40, 147.18, 163.18, 172.27.

$^1\text{H}$ -NMR for Biotin-phenol (500 MHz,  $d^6$ -DMSO): 7.85 (1H, t), 6.96 (2H, d), 6.67 (2H, d), 6.56 (1H, s), 6.46 (1H, s), 4.30 (1H, m), 4.12 (1H, m), 3.18 (2H, dd), 3.05 (1H, dd), 2.79 (1H, dd), 2.57 (3H, m), 2.04 (2H, t), 1.42-1.61 (4H, m), 1.27 (2H, m).  $^{13}\text{C}$ -NMR for Biotin-phenol (125 MHz,  $d^6$ -DMSO): 25.50, 28.18, 28.36, 34.56, 35.40, 40.06, 55.63, 59.46, 61.28, 115.28, 129.62, 140.70, 155.92, 163.16, 172.29, 192.48.

#### MS characterization of biotin probes

The following MS characterization of purified probes was acquired on Fourier Transform High Resolution Mass Spectrometry (FTMS) :

Biotin-Aniline: calculated for  $\text{C}_{18}\text{H}_{27}\text{N}_4\text{O}_2\text{S}$ :  $[\text{M}+\text{H}]^+$ : 363.18547; found: 363.18492

Biotin-Phenol: calculated for  $\text{C}_{18}\text{H}_{26}\text{N}_3\text{O}_3\text{S}$ :  $[\text{M}+\text{H}]^+$ : 364.16949; found: 364.16894

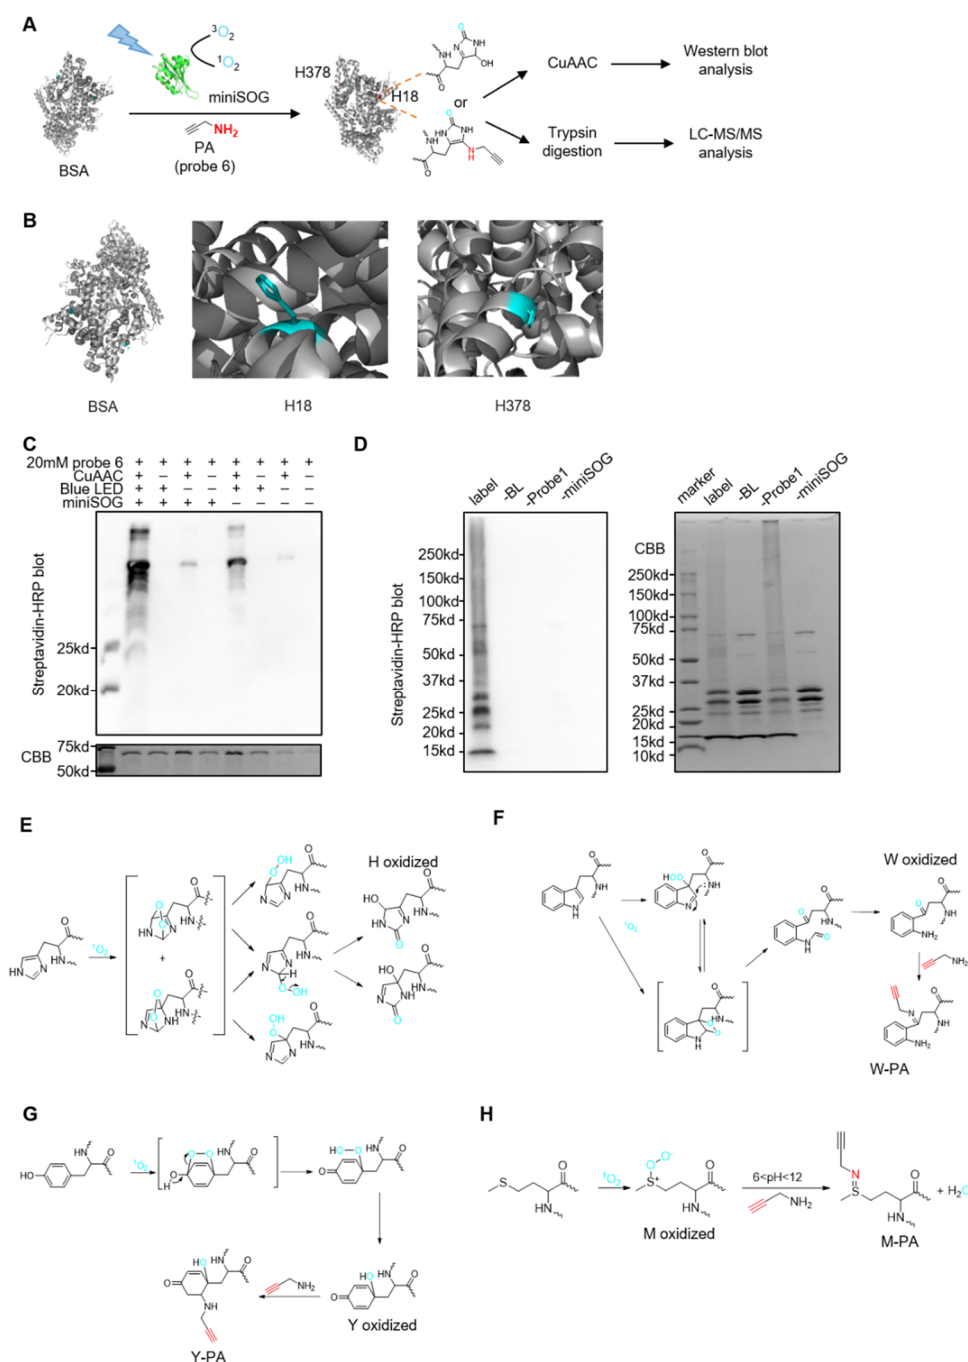

**Supplementary Figure 1. miniSOG-mediated protein labeling *in vitro*.** **A)** Scheme of BSA labeling mediated by miniSOG (PDB ID: 6GPU) and PA (probe **6**) with blue LED irradiation. **B)** Crystal structure of BSA (PDB ID: 4F5S) with two of its reactive histidine residues (H18 and H378) highlighted in cyan. Both residues are solvent-exposed. **C)** Western blot and CBB of miniSOG labeled BSA samples with controls. **D)** Western blot and CBB of miniSOG and probe 1 labeled sortase A (PDB:1T2W) samples with controls. The concentration of SDS-PAGE is 12% (C) or 4-20% gradient (D). **E)** Mechanism of histidine oxidation by singlet oxygen<sup>4</sup>. **F-H)** Mechanism of singlet oxygen-mediated oxidation of tryptophan, tyrosine and methionine<sup>4</sup> and the proposed nucleophilic addition products with probe **6**.



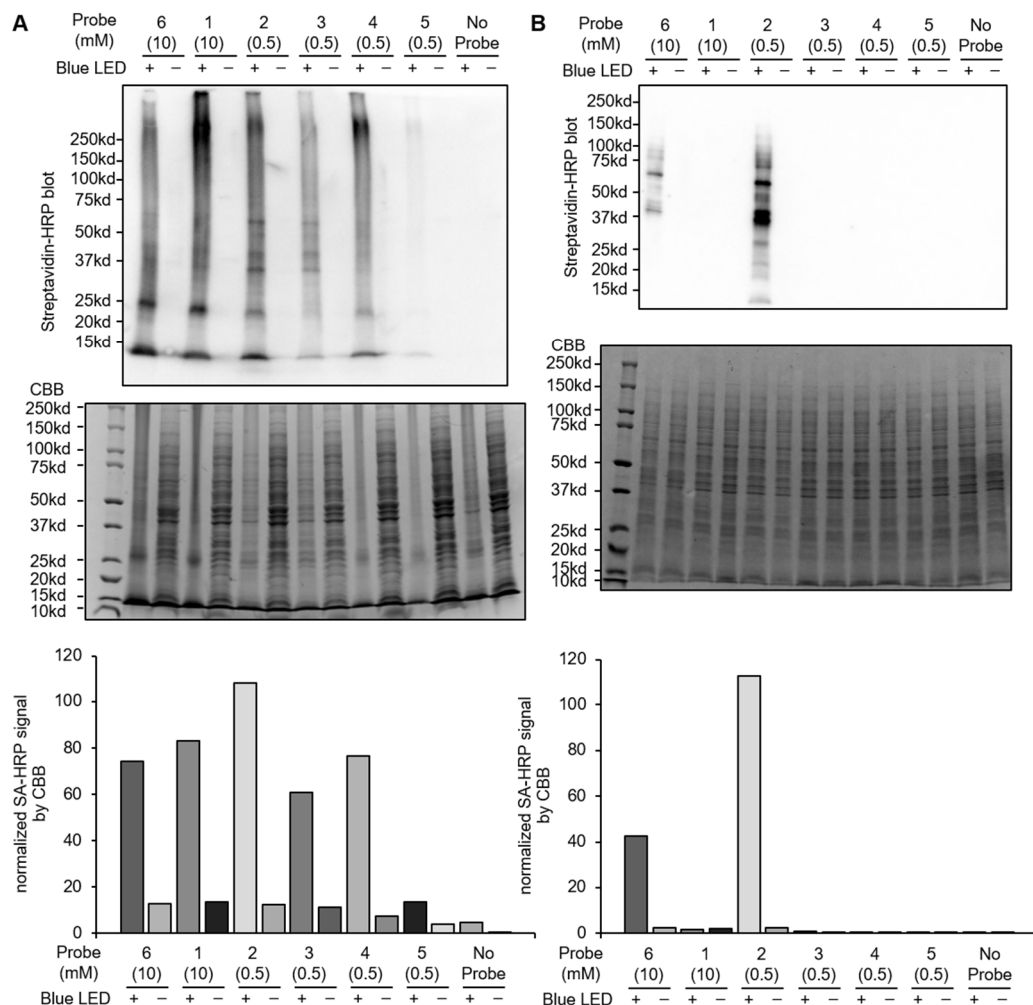

**Supplementary Figure 2. Comparison of different probes for RinID activity in live cells and in cell lysates. A)** Western blot and CBB of miniSOG labeled proteome samples with different nucleophilic probes in cell lysate; Probe concentration: 10 mM probe 1 and 6, 0.5 mM for other four probes. **B)** Western blot of miniSOG labeled proteome samples with different nucleophilic probes in miniSOG-NES HEK293T stable cell line. Probe concentration: 10 mM probe 1 and 6, 0.5 mM for other four probes. Bar graphs indicates the signal intensity of Streptavidin-HRP blot of each lane normalized by CBB. The concentration of SDS-PAGE is 4-20%.

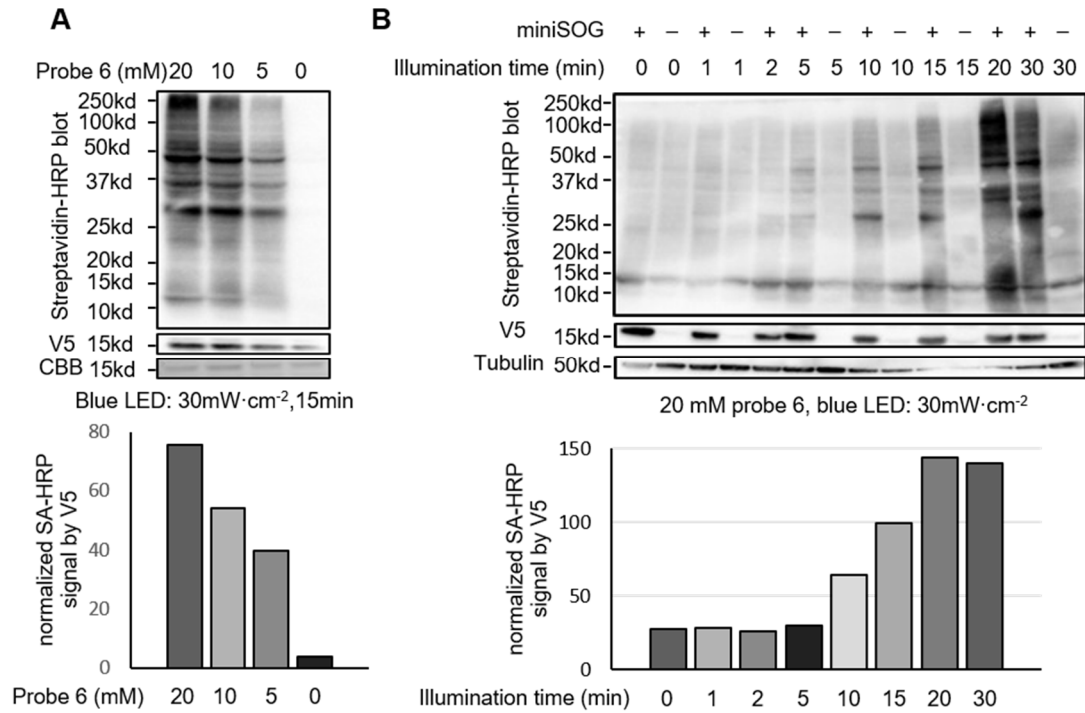

**Supplementary Figure 3. Optimization of probe 6 concentration and illumination time. A-B)** Western blot analysis of proteins labeled with mitochondrial matrix-targeted miniSOG (mito-V5-miniSOG) at different probe 6 concentrations (A) and illumination time (B). Bar graphs indicates the signal intensity of Streptavidin-HRP blot of each lane normalized by V5 (only miniSOG+ lanes are analyzed in (B)). The concentration of SDS-PAGE is 4-20%.

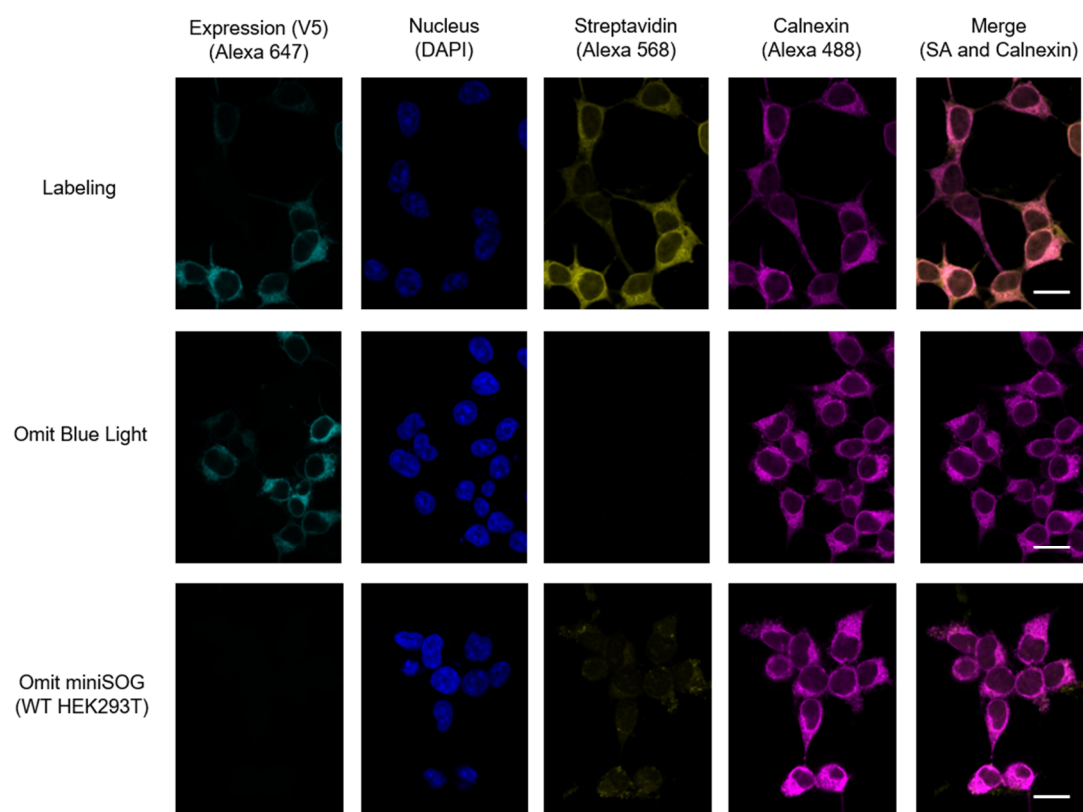

**Supplementary Figure 4. Confocal fluorescence imaging of HEK293T cells expressing ERM-targeted miniSOG.** Cells were labeled with 20 mM probe 6 and 30mW·cm<sup>-2</sup> blue LED illumination for 15min. miniSOG was fused to V5 tag. Scale bar: 20  $\mu$ m.

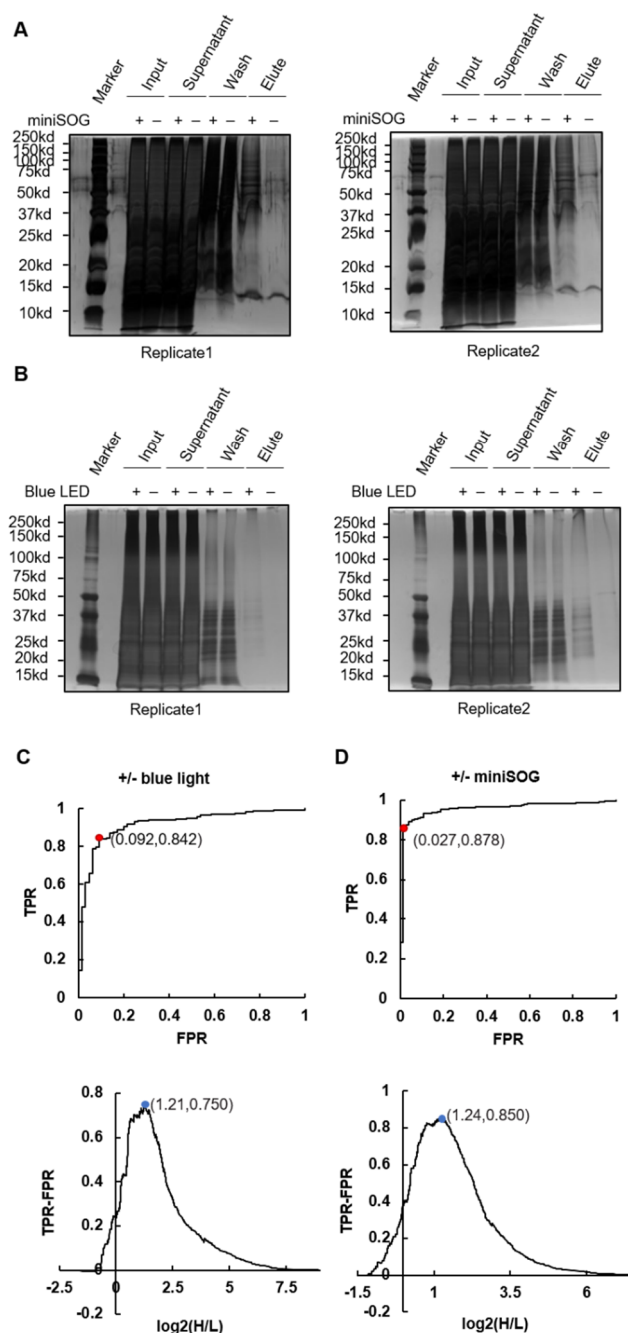

**Supplementary Figure 5. Mitochondria proteome identification by RinID.** A-B) SDS-PAGE and silver staining of miniSOG-labeled mitochondrial proteome samples for MS identification. Comparisons of RinID labeled sample with negative controls omitting miniSOG (A) or blue light (B). Samples were labeled with 20 mM probe 6 and 30 mW·cm<sup>-2</sup> blue light illumination for 15 min. The concentration of SDS-PAGE in (A) is 12%, in (B) is 4-20%. C-D) Receiver operator curve (ROC) analysis of mitochondrial proteome identified by RinID. ROC curves of +/- blue light dataset (C) and +/- miniSOG dataset (D) are used to determine H/L cut-off. The FPR and TPR of the cut-off points are shown as red dots. The cut-off log<sub>2</sub>(H/L) and the TPR-FPR at the cut-off point are shown as blue dots.

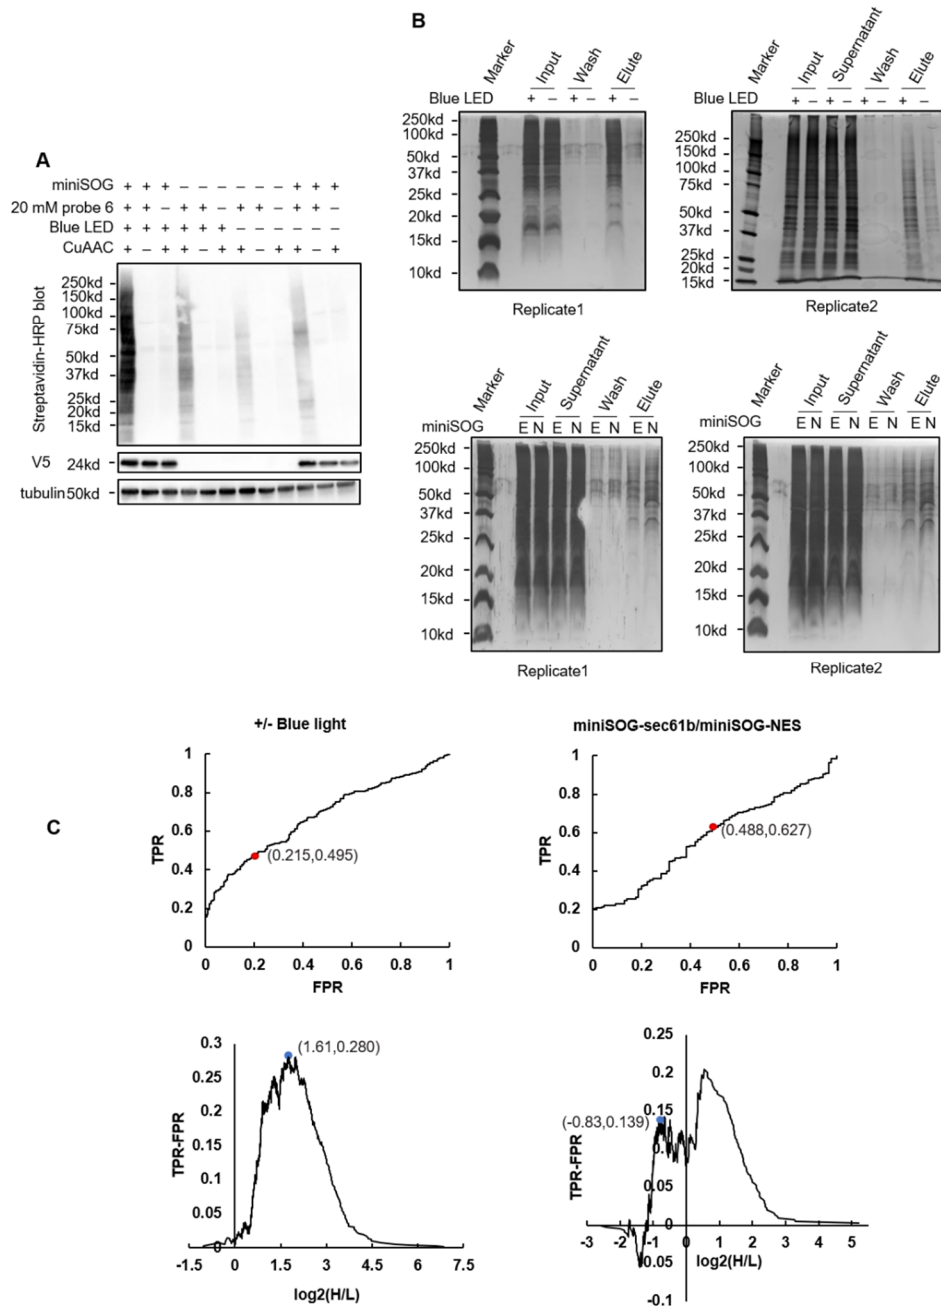

**Supplementary Figure 6. ER membrane (ERM) proteome identification by RinID. A)** Western blot of ERM proteome labeled by V5-miniSOG-sec61b with negative controls omitting blue light irradiation, probe 6, miniSOG, and/or CuAAC. **B)** Silver staining of ERM proteome samples labeled by V5-miniSOG-sec61b for MS identification, with negative control omitting blue light (two images on the top) or labeled with miniSOG-NES (two images at bottom). E: ERM, N: NES. The concentration of SDS-PAGE of (A) and replicate 2 of omitting blue light in (B) is 4-20%, the concentration of other three images is 12%. **C)** Receiver operator curve (ROC) analysis of ERM proteome identified by RinID. ROC curves of +/- blue light dataset (left) and ERM/NES miniSOG dataset (right) are used to determine H/L cut-off. The FPR and TPR of the cut-off points are shown as red dots. The cut-off  $\log_2(H/L)$  and the TPR-FPR at the cut-off point are shown as blue dots.

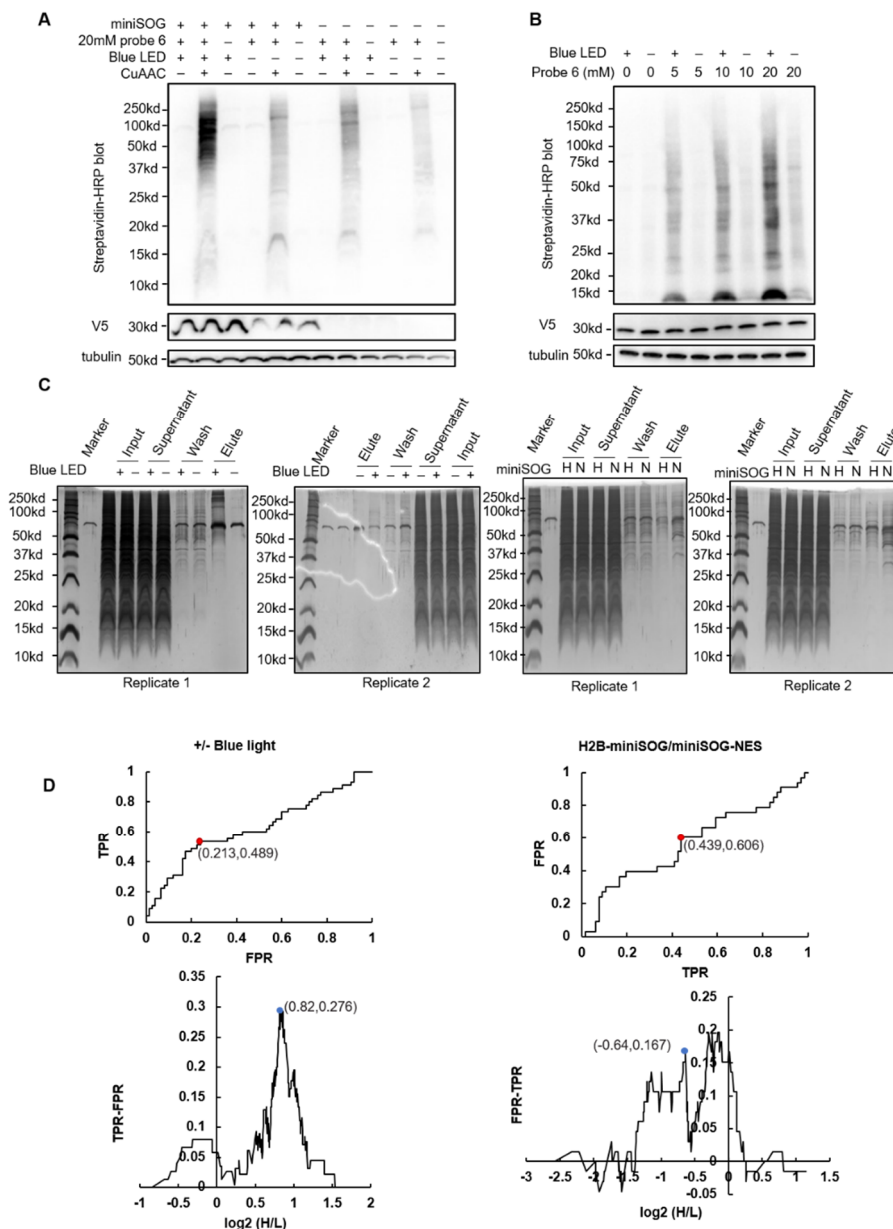

**Supplementary Figure 7. Nuclear proteome identification by RinID. A)** Western blot of nuclear proteome labeled by V5-H2B-miniSOG with negative controls omitting blue light irradiation, probe 6, miniSOG, and/or CuAAC. **B)** Western blot of nuclear proteome samples labeled by V5-H2B-miniSOG at different probe 6 concentrations. **C)** Silver staining of nucleus proteome samples labeled by V5-H2B-miniSOG for MS identification, with negative control omitting blue light (two images at left) or labeled with miniSOG-NES (two images at right). H: H2B; N: NES. The concentration of SDS-PAGE in (A) and (C) is 12%, in (B) is 4-20%. **D)** Receiver operator curve (ROC) analysis of nuclear proteome identified by RinID. ROC curves of +/- blue light dataset (left) and H2B/NES miniSOG dataset (right) are used to determine H/L cut-off. The FPR and TPR of the cut-off points are shown as red dots. The cut-off  $\log_2(H/L)$  and the TPR-FPR at the cut-off point are shown as blue dots.

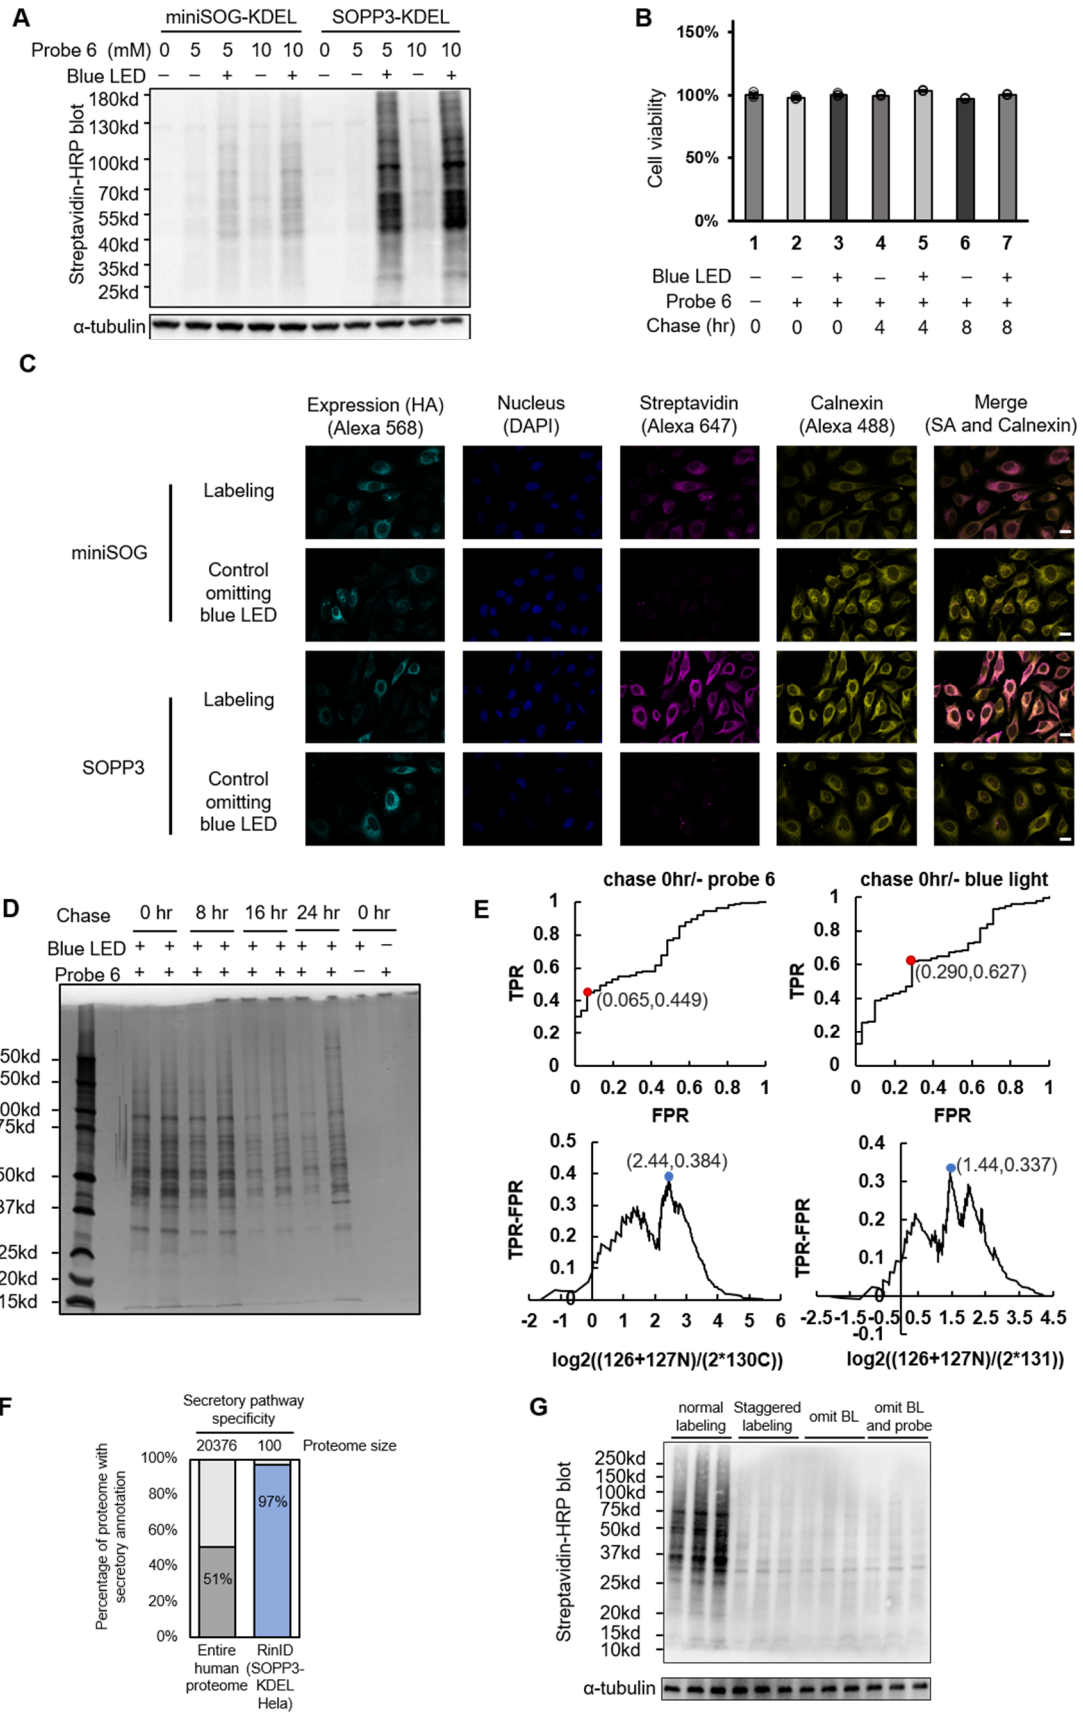

**Supplementary Figure 8. Pulse-chase labeling of secretory pathway proteome with SOPP3-based RinID.** **A)** Western blot of ER lumen proteome of HeLa cells labeled with miniSOG or SOPP3 at different probe 6 concentrations, with blue light illumination at 30 mW·cm<sup>-2</sup> for 5 min. **B)** Cell viability assay of HeLa cells at 0, 4, and 8 hours after SOPP3 labeling in the ER lumen with 5 min blue light irradiation at 30 mW·cm<sup>-2</sup> and 5 mM probe 6. Error bar: mean ± SD, n = 3 biologically independent samples. **C)** Confocal fluorescence images comparing miniSOG and SOPP3 labeling in the ER lumen of HeLa cells. miniSOG and SOPP3 are targeted to the ER lumen via N-terminal fusion of Igk secretory sequence and C-terminal fusion of KDEL motif (ss-miniSOG/SOPP3-KDEL). Calnexin is a marker for ER. Labeling condition: 5 mM probe 6, 30 mW·cm<sup>-2</sup>, 5 min blue LED irradiation. Scale bar: 20 μm. **D)** Silver staining of ER lumen proteome samples of HeLa cells pulse-chase labeled by ss-SOPP3-KDEL for MS identification, with negative control omitting probe 6 or blue light. The concentration of SDS-PAGE is 4-20%. **E)** Receiver operator curve (ROC) analysis of ER lumen proteome identified by pulse-chase RinID. ROC curves of the proteins ranked by  $\log_2((126+127N)/(2*130C))$  (chase 0 hour/-probe 6) and by  $\log_2((126+127N)/(2*131))$  (chase 0 hour/-blue light) are used to determine cut-off ratio. The FPR and TPR of the cut-off points are shown as red dots. The cut-off ratio and the TPR-FPR at the cut-off point are shown as blue dots. **F)** Spatial specificity analysis of ER lumen proteome identified by SOPP3 mediated pulse-chase RinID. **G)** Western blot to confirm whether probe 6 could react with the oxidized proteins after blue light irradiation. Cells were treated with four different conditions: (1) irradiated with blue LED in the presence of probe 6 in HBSS for 5 min (normal labeling); (2) irradiated with blue LED in the absence of probe 6 in HBSS for 5 min, followed by incubating with probe 6 in HBSS in the dark for 5 min (staggered labeling); (3) incubated with probe 6 in the dark in HBSS for 5 min (omit BL); and (4) incubated in HBSS in the absence of probe 6 in the dark for 5 min (omit BL and probe).



## SUPPLEMENTARY REFERENCES

1. Y. Zhou, G. Wang, P. Wang, Z. Li, T. Yue, J. Wang, P. Zou, *Angew. Chem. Int. Ed.* **2019**, *58*, 11763-11767.
2. S. Rath, R. Sharma, R. Gupta, T. Ast, C. Chan, T. J. Durham, R. P. Goodman, Z. Grabarek, M. E. Haas, W. H. W. Hung, P. R. Joshi, A. A. Jourdain, S. H. Kim, A. V. Kotrys, S. S. Lam, J. G. McCoy, J. D. Meisel, M. Miranda, A. Panda, A. Patgiri, R. Rogers, S. Sadre, H. Shah, O. S. Skinner, T.-L. To, M. A. Walker, H. Wang, P. S. Ward, J., Wengrod, C.-C. Yuan, S. E. Calvo, V. K., Mootha, *Nucleic Acids Res.* **2021**, *49*, D1541-D1547.
3. Branon, T. C.; Bosch, J. A.; Sanchez, A. D.; Udeshi, N. D.; Svinkina, T.; Carr, S. A.; Feldman, J. L.; Perrimon, N.; Ting, A. Y., Efficient proximity labeling in living cells and organisms with TurboID. *Nat. Biotechnol.* **2018**, *36* (9), 880-887.
4. P. Di Mascio, G. R. Martinez, S. Miyamoto, G. E. Ronsein, M. H. G. Medeiros, J. Cadet, *Chem. Rev.* **2019**, *119*, 2043-2086.
